# Supplementary material
Source: PubMed Central journal article supplement (PMC9980486)
Supplement: Supplementary_Digital_Material1.pdf [file Supplementary_Digital_Material1.pdf]

SUPPLEMENTARY DIGITAL MATERIAL 1

Supplementary Table I.—Baseline characteristics of patients.

| Variables                                                                        | All patients<br>(N.=40) | SWD<br>group<br>(N.=27) | Control<br>group<br>(N.=13) | P<br>value |
|----------------------------------------------------------------------------------|-------------------------|-------------------------|-----------------------------|------------|
| Demographic                                                                      |                         |                         |                             |            |
| Age, median (IQR), y                                                             | 65 (59-67)              | 62 (56-66)              | 72 (59-74)                  | 0.076      |
| Sex (female), N. (%)                                                             | 15 (37.5)               | 10 (37.0)               | 5 (38.5)                    | 1.000      |
| Days between diagnosis and enrollment, mean (SD)                                 | 6.8 (2.4)               | 6.6 (2.3)               | 7.2 (2.5)                   | 0.517      |
| Days between onset and enrollment, mean (SD)                                     | 15.8 (3.6)              | 16.3 (3.6)              | 14.7 (3.6)                  | 0.197      |
| Seven-category scale, N. (%)                                                     |                         |                         |                             | 0.588      |
| 1 not hospitalized with resumption of normal activities                          | 0                       | 0                       | 0                           |            |
| 2 not hospitalized, but unable to resume normal activities                       | 0                       | 0                       | 0                           |            |
| 3 non-ICU hospitalization, not requiring supplemental oxygen                     | 20 (50.0)               | 14 (51.9)               | 6 (46.1)                    |            |
| 4 non-ICU hospitalization, requiring supplemental oxygen                         | 17 (41.5)               | 12 (42.9)               | 5 (38.5)                    |            |
| 5 ICU hospitalization, not requiring ECMO and/or invasive mechanical ventilation | 3 (7.3)                 | 1 (3.5)                 | 2 (15.4)                    |            |
| 6 ICU hospitalization, requiring ECMO and/or invasive mechanical ventilation     | 0                       | 0                       | 0                           |            |
| 7 Death                                                                          | 0                       | 0                       | 0                           |            |
| Laboratory examination, N. (%)                                                   |                         |                         |                             |            |
| White blood cell count ( $\times 10^9/L$ )                                       |                         |                         |                             | 0.677      |
| <4                                                                               | 5 (12.5)                | 3 (11.1)                | 2 (15.4)                    |            |
| 4-10                                                                             | 32 (80.0)               | 21 (77.8)               | 11 (84.6)                   |            |
| >10                                                                              | 3 (7.5)                 | 3 (11.1)                | 0                           |            |

|                                       |           |           |           |       |
|---------------------------------------|-----------|-----------|-----------|-------|
| Neutrophil count ( $\times 10^9/L$ )  |           |           |           | 1.000 |
| >7.0                                  | 3 (7.5)   | 2 (7.4)   | 1 (7.7)   |       |
| $\leq 7.0$                            | 37 (92.5) | 25 (92.5) | 12 (92.3) |       |
| Lymphocyte count ( $\times 10^9/L$ )  |           |           |           | 1.000 |
| >1.5                                  | 9 (22.5)  | 6 (22.2)  | 3 (23.1)  |       |
| $\leq 1.5$                            | 31 (77.5) | 21 (77.8) | 10 (76.9) |       |
| Platelet count ( $\times 10^9/L$ )    |           |           |           | 0.898 |
| $\geq 100$                            | 35 (87.5) | 23 (85.2) | 12 (92.3) |       |
| <100                                  | 5 (12.5)  | 4 (14.8)  | 1 (7.7)   |       |
| Creatinine ( $\mu\text{mol/L}$ )      |           |           |           |       |
| $\leq 133$                            | 36 (90.0) | 24 (88.9) | 12 (92.3) | 1.000 |
| >133                                  | 4 (10.0)  | 3 (11.1)  | 1 (7.7)   |       |
| Aspartate aminotransferase (U/L)      |           |           |           | 0.822 |
| $\leq 40$                             | 36 (90.0) | 25 (92.6) | 11 (84.6) |       |
| >40                                   | 4 (10.0)  | 2 (7.4)   | 2 (15.4)  |       |
| Alanine aminotransferase (U/L)        |           |           |           | 1.000 |
| $\leq 40$                             | 38 (95.0) | 26 (96.3) | 12 (92.3) |       |
| $\leq 40$                             | 2 (5.0)   | 1 (3.7)   | 1 (7.7)   |       |
| Comorbidities, N. (%)                 |           |           |           |       |
| Hypertension                          | 12 (30.0) | 10 (37.0) | 2 (15.4)  | 0.302 |
| Coronary Heart disease                | 12 (30.0) | 9 (33.3)  | 3 (23.1)  | 0.768 |
| Chronic obstructive pulmonary disease | 18 (45.0) | 14 (51.9) | 4 (30.8)  | 0.209 |
| Cerebrovascular disease               | 11 (27.5) | 9 (33.3)  | 2 (12.4)  | 0.416 |
| Chronic liver disease                 | 2 (5.0)   | 1 (3.7)   | 1 (7.7)   | 1.000 |
| Chronic kidney disease                | 3 (7.5)   | 2 (7.4)   | 1 (7.7)   | 1.000 |

IQR: Interquartile range; SD: standard deviation; ICU: Intensive Care Unit; ECMO: Extracorporeal Membrane Oxygenation; SWD: short-wave diathermy; y: year; N.: number.
